# Supplementary material
Source: PubMed Central journal article supplement (PMC2955498)
Supplement: mmc1.pdf [file mmc1.pdf]

## Supporting Material

### Cell Penetrating Peptide Induces Leaky Fusion of Liposomes Containing Late Endosome Specific Anionic Lipid

Sung-Tae Yang, Elena Zaitseva, Leonid V Chernomordik, and Kamran Melikov

## SUPPLEMENTAL FIGURES

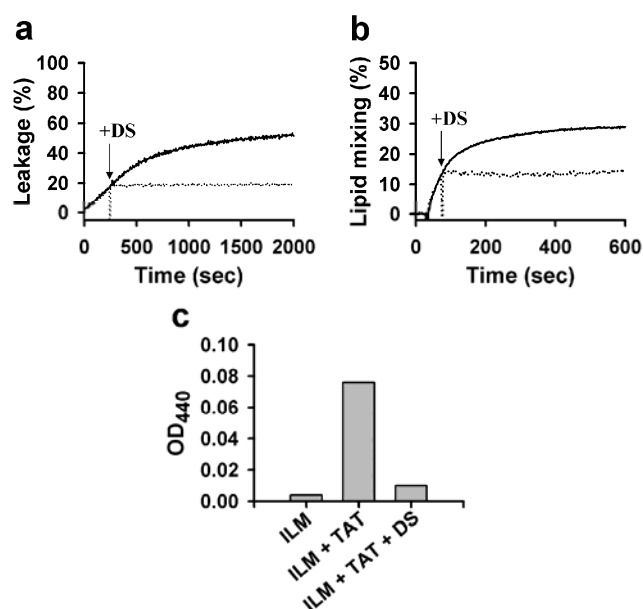

**Figure S1.** Dextran sulfate inhibits leakage of encapsulated water soluble dye, lipid mixing and reverses liposome aggregation. a) Addition of 20  $\mu\text{M}$  DS (+DS) inhibits TAT-induced (2  $\mu\text{M}$  peptide concentration) fluorescence dequenching due to release of ANTS/DPX from ILM liposomes (dotted line). Control experiment without addition of DS is shown as solid line. b) Addition of 20  $\mu\text{M}$  DS (+DS) inhibits TAT-induced (2  $\mu\text{M}$  peptide concentration) Rh-PE dequenching due to lipid mixing between ILM liposomes (25  $\mu\text{M}$  final total lipid concentration) induced by 1  $\mu\text{M}$  TAT at pH 5.5 (dotted line). Control experiment without addition of DS is shown as solid line. c) OD<sub>440</sub> measured after 30 min incubation of ILM liposomes without TAT or DS (ILM), with 2  $\mu\text{M}$  of TAT alone (ILM+TAT) or after 30 min incubation with 2  $\mu\text{M}$  of TAT followed by 30 minute incubation with 20  $\mu\text{M}$  DS (ILM+TAT+DS).

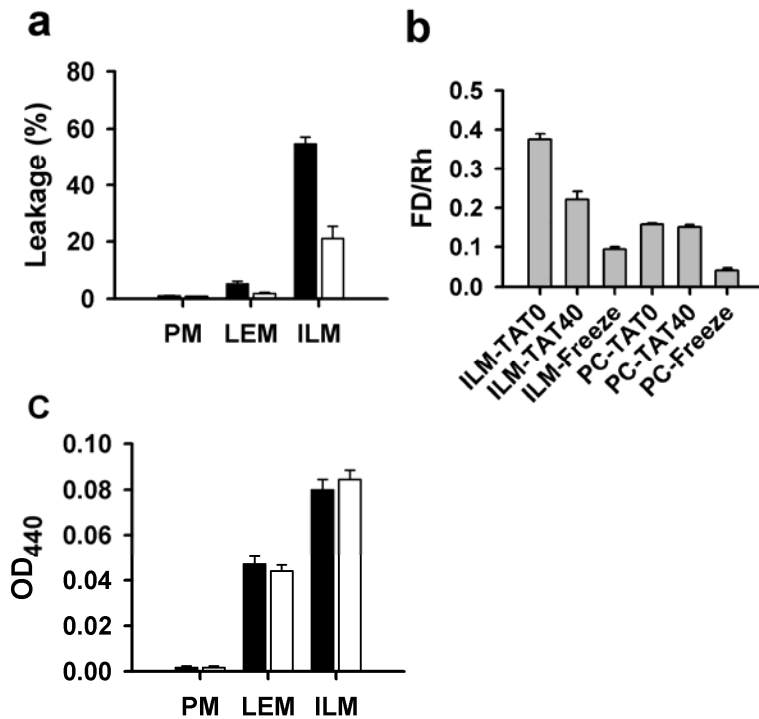

**Figure S2.** a) TAT-induced release of HPTS from LUVs of different lipid composition. 2  $\mu$ M of TAT was added to 25  $\mu$ M of ILM-, LEM- or PM-liposomes at pH 5.5 (black bars) or at pH 7.4 (white bars). Percent of leakage was measured at 30 min after addition of TAT. Mean and standard deviation of 3 independent experiments are shown. b) TAT mediates release of 70kDa fluorescein tagged dextran from Rhodamine PE labeled ILM liposomes. The ratio of fluorescein- ( $\lambda_{ex}=495$  nm,  $\lambda_{em}=520$  nm) and rhodamine- ( $\lambda_{ex}=560$  nm,  $\lambda_{em}=585$  nm) fluorescence was measured after separation of released dextran on density gradient following 30 min incubation of ILM or PC liposomes (500  $\mu$ M final concentration) without TAT (ILM-TAT0 and PC-TAT0) or with 40  $\mu$ M TAT (ILM-TAT40 and PC-TAT40) or after 3 cycles of freezing-thawing (ILM-freeze and PC-freeze). Decrease in ratio reflects release of encapsulated water soluble dextran. c) TAT-induced vesicle aggregation. The turbidity of liposomes was measured at  $\lambda=440$ nm 30 min after addition of 2  $\mu$ M TAT to 25  $\mu$ M ILM-, LEM- or PM-liposomes at pH 5.5 (black bars) or at pH 7.4 (white bars). Mean and standard deviation of 3 independent experiments are shown.

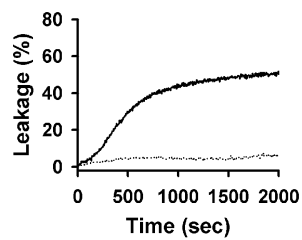

**Figure S3.** Replacement of BMP with PG in ILM liposomes inhibits aqueous dye leakage. Kinetics of dye dequenching due to release of ANTS/DPX from 25  $\mu\text{M}$  of ILM- (solid line) and PG: PC: PE (77:19:4) (dotted line) liposomes upon addition of 2  $\mu\text{M}$  TAT peptide at pH 5.5.

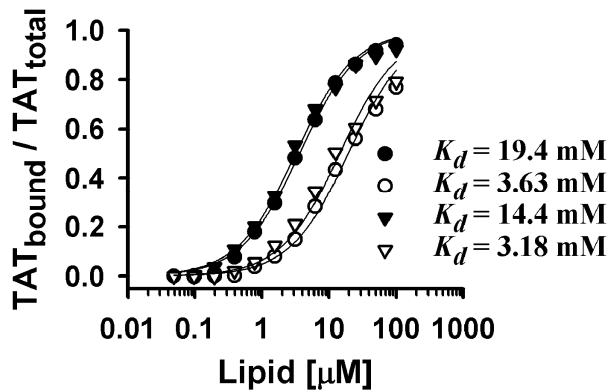

**Figure S4.** TAT peptide binds with similar affinity to BMP:PC (1:1) and PG:PC (1:1) liposomes at both acidic pH 5.5 and neutral pH 7.4. Dependence of fraction of bound peptide  $TAT_{bound}/TAT_{total}$  on lipid concentration for BMP/PC (1:1) (circles) and PG/PC (1:1) (triangles) liposomes in pH 5.5 (filled symbols) or pH 7.4 (open symbols) is shown. To determine the apparent dissociation constant  $K_d$  data was fitted by equation  $[P_b]/[P_{tot}] = [L]/(K_d + [L])$ , where  $[P_b]$  is the amount of bound peptide,  $[P_{tot}]$  is the total peptide concentration by measuring the fraction of bound peptide, and  $[L]$  is lipid concentration. Fit is shown as solid curves and  $K_d$  for different data sets are listed on the figure.

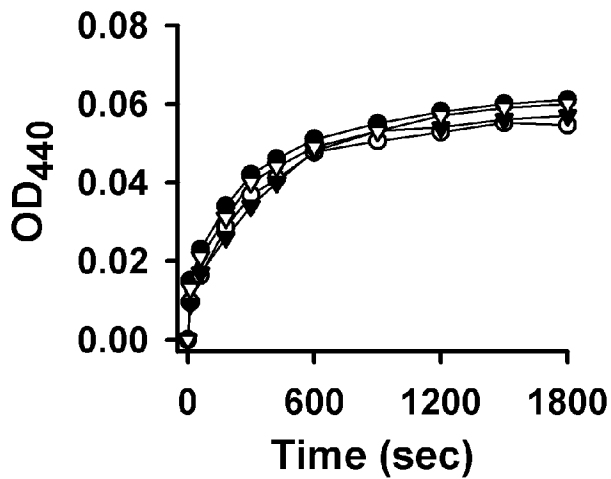

**Figure S5.** TAT-induced vesicle aggregation. TAT-induced change in the turbidity (440 nm) was measured for BMP:PC (1:1) (circles) and PG:PC (1:1) (triangles) liposomes in either pH 5.5 (filled symbols) or pH 7.4 (open symbols) was measured at different times after peptide addition. TAT concentration was 1  $\mu$ M and total lipid concentration was 25  $\mu$ M.

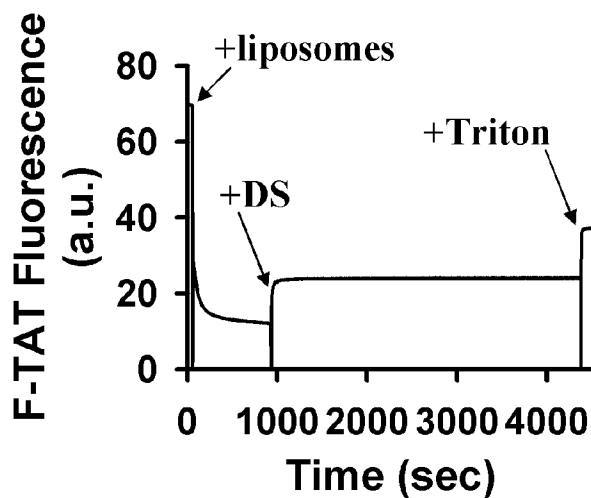

**Figure S6.** TAT peptide that entered liposomes remains entrapped after extended incubation. Change in fluorescence of fluorescein tagged TAT (2  $\mu$ M) at pH 5.5 after addition of 25  $\mu$ M of ILM liposomes (+liposomes), 20  $\mu$ M dextran sulfate (+DS), and finally 0.1% Triton X-100 (+Triton).

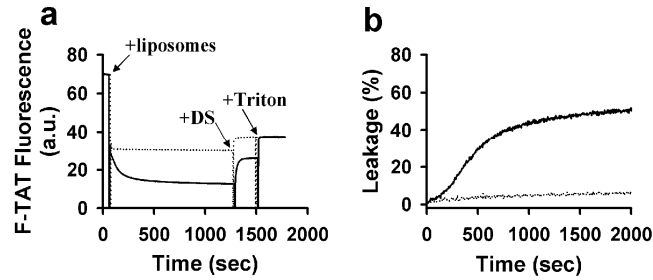

**Figure S7.** Inclusion of 2 mol% of PEG-PE lipid in ILM liposomes inhibits TAT peptide translocation and aqueous dye leakage. (a) Change in fluorescence of fluorescein tagged TAT (2  $\mu\text{M}$ ) at pH 5.5 after addition of 25  $\mu\text{M}$  of ILM-(solid line) and BMP: PC: PE:PEG-PE (77:17:4:2) (dotted line) liposomes (+liposomes), 20  $\mu\text{M}$  dextran sulfate (+DS), and finally 0.1% Triton X-100 (+Triton). (b) Kinetics of dye dequenching due to release of ANTS/DPX from 25  $\mu\text{M}$  of ILM-(solid line) and BMP: PC: PE:PEG-PE (77:17:4:2) (dotted line) liposomes upon addition of 2  $\mu\text{M}$  TAT peptide at pH 5.5.

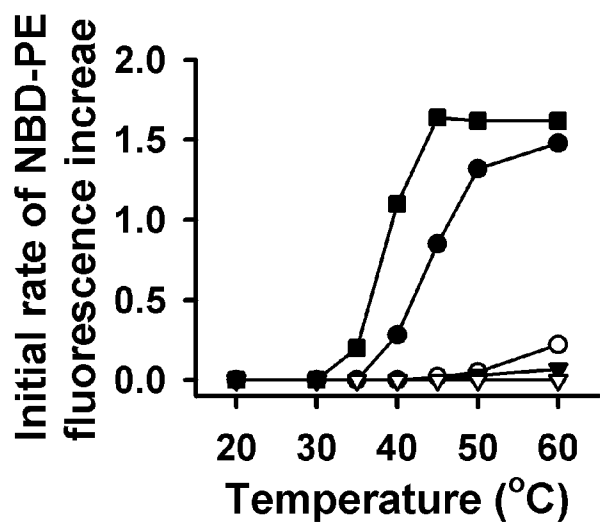

**Figure S8.** Effect of BMP and PG on the  $L_{\alpha} \rightarrow H_{II}$  phase transition temperature ( $T_H$ ) of PE. Dependencies of initial rate of NBD fluorescence increase upon injection into pH 10 buffer on buffer temperature is shown for PE- (filled squares), PE:BMP (95:5) (filled circles), PE:BMP (9:1) (open circles), PE:PG (95:5) (filled triangles) and PE:PG (9:1) liposomes are shown. All liposomes contain 0.1 mol% of NBD-PE fluorescent lipid.
